# Supplementary material for: An Integrated Approach to Reconstructing Genome-Scale Transcriptional Regulatory Networks
Source: PubMed Central journal article supplement (PMC4344238; doi:10.1371/journal.pcbi.1004103), 2015-02-27
Supplement: pcbi.1004103.s001.pdf [file pcbi.1004103.s001.pdf]

# Sequence data

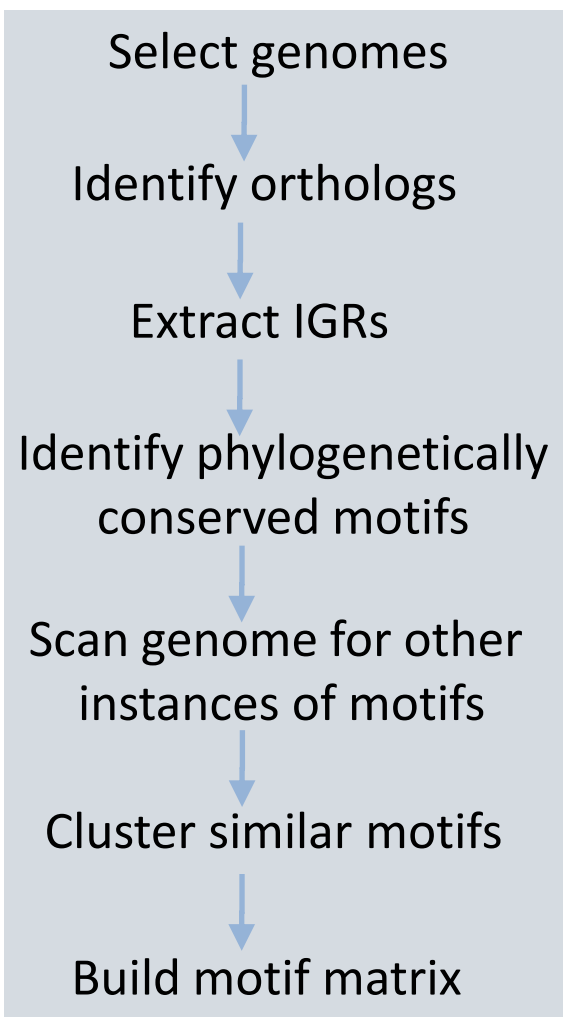

Phylogenetic footprinting

# Expression data

## Data preprocessing

e.g., collection and categorization of arrays, data normalization, etc.

Data integration  
(DISTILLER)

Sequence-based clusters  
of  
co-regulated genes

Bi-clusters  
of  
co-regulated genes

Regulator prediction

Phylogeny-based  
TRN

Expression based network  
inference  
(CLR, GENIE3, ANOVA)

Consensus  
Expression-based  
TRN

Combined  
TRN
