# Supplementary material for: An Integrated Approach to Reconstructing Genome-Scale Transcriptional Regulatory Networks
Source: PubMed Central journal article supplement (PMC4344238; doi:10.1371/journal.pcbi.1004103), 2015-02-27
Supplement: pcbi.1004103.s003.pdf [file pcbi.1004103.s003.pdf]

### A. Correlated expression profile

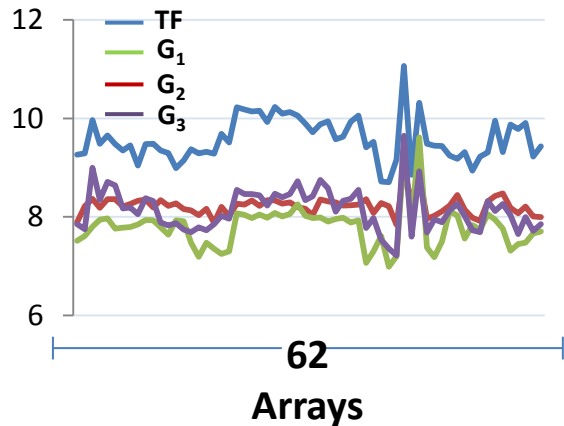

If a transcription factor (TF) is highly correlated to other genes (G) within a cluster, the TF is given a high score for that cluster.

### B. TF proximity to cluster motifs

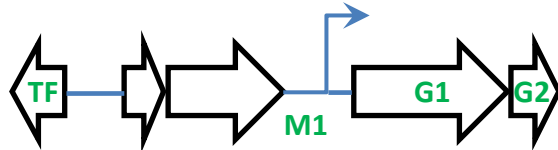

If a transcription factor's (TF) genomic location is close to one (or more) of the motifs (M1) identified in the cluster, the TF is given a high score.

### C. Structure of DNA-binding domain (DBD)

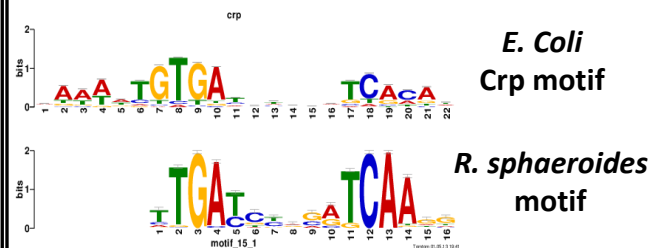

The DBD family of each *R. sphaeroides* TF was determined by Pfam analysis. Then for each identified phylogenetically conserved motif, potential TFs are scored by comparing this motif to the *E. coli* motif of the DBD family to which a given TF belongs. TFs with high similarities get high scores.

### D. Phylogenetic correlation

| Organisms                       | Motif occurrence correlation | TF occurrence |
|---------------------------------|------------------------------|---------------|
| <i>R. sphaeroides</i> 2.4.1     | 1                            | 1             |
| <i>R. capsulatus</i>            | 0.5                          | 1             |
| <i>R. sphaeroides</i> ATCC17025 | 0.9                          | 1             |
| <i>R. denitrificans</i>         | 0.6                          | 1             |
| <i>B. japonicum</i>             | 0                            | 0             |
| <i>P. denitrificans</i>         | 0                            | 0             |
| <i>R. palustris</i>             | 0.5                          | 0             |
| <i>D. shibae</i>                | 0.5                          | 1             |
| <b>Phylogenetic correlation</b> |                              | <b>0.76</b>   |

If there is a strong correlation between the occurrence of a TF and a motif across the selected genomes, then the TF gets a high score.
