# Supplementary material for: An Integrated Approach to Reconstructing Genome-Scale Transcriptional Regulatory Networks
Source: PubMed Central journal article supplement (PMC4344238; doi:10.1371/journal.pcbi.1004103), 2015-02-27
Supplement: pcbi.1004103.s007.pdf [file pcbi.1004103.s007.pdf]

# A. Expression profiles for Cluster 60

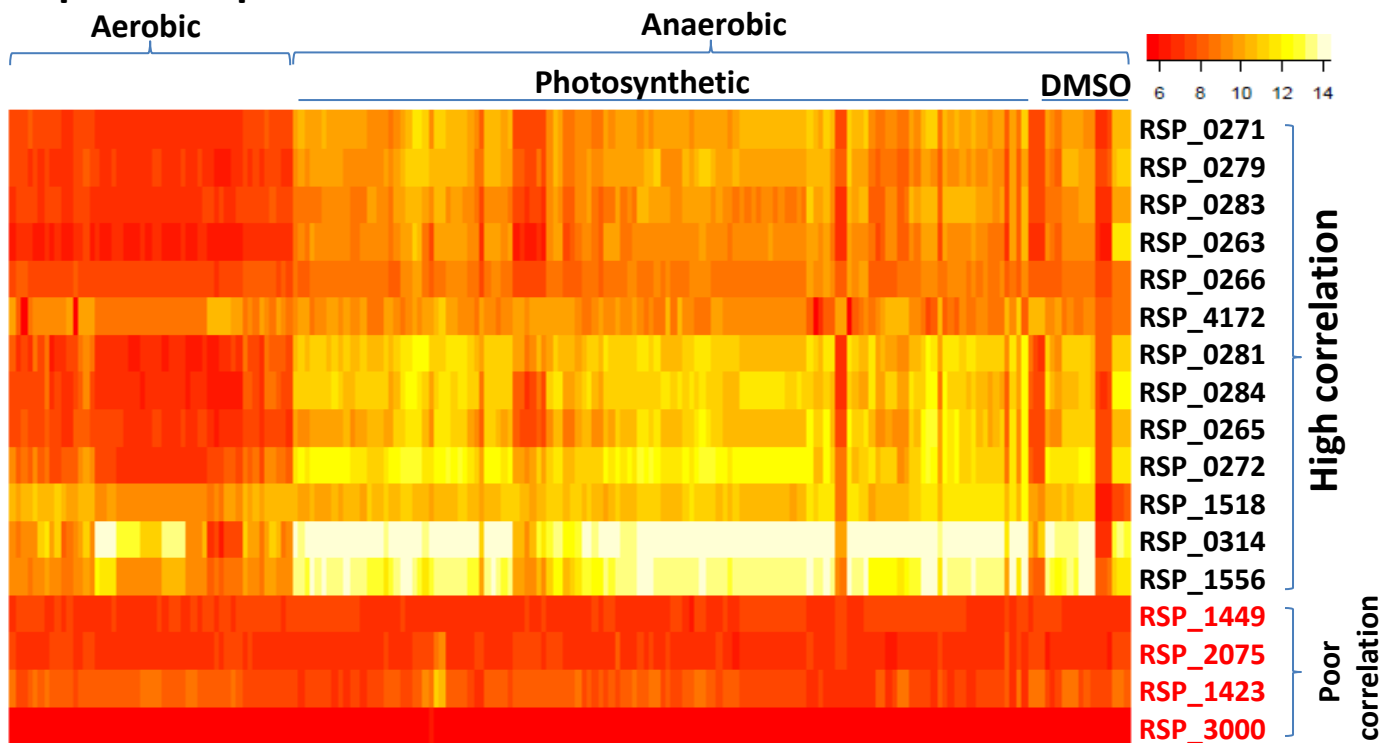

# B. Predictions for Cluster 60

Phylogenetic footprinting

| ID       | Annotation                | Verified* |
|----------|---------------------------|-----------|
| RSP_0263 | <i>bchC</i>               | ✓         |
| RSP_0265 | <i>crtE</i>               | ✓         |
| RSP_0266 | <i>crtD</i>               | ✓         |
| RSP_0271 | <i>crtI</i>               | ✓         |
| RSP_0272 | <i>crtA</i>               | ✓         |
| RSP_0279 | <i>bchG</i>               | ✓         |
| RSP_0281 | <i>bchE</i>               | ✓         |
| RSP_0283 | <i>ppaA</i>               | ✓         |
| RSP_0284 | <i>bchF</i>               | ✓         |
| RSP_0314 | <i>pucB</i>               | ✓         |
| RSP_1518 | <i>prrA</i>               | ✓         |
| RSP_1556 | <i>puc2B</i>              | ✓         |
| RSP_4172 | Hypothetical              | ✗         |
| RSP_1423 | ParA family ATPase        | ✗         |
| RSP_1449 | Transcriptional regulator | ✗         |
| RSP_2075 | Transcriptional regulator | ✗         |
| RSP_3000 | Hypothetical              | ✗         |
| RSP_7374 | <i>mvpT</i>               | ✗         |

Phylogenetic footprinting

+

Bi-clustering

| ID       | Annotation   | Verified* |
|----------|--------------|-----------|
| RSP_0263 | <i>bchC</i>  | ✓         |
| RSP_0265 | <i>crtE</i>  | ✓         |
| RSP_0266 | <i>crtD</i>  | ✓         |
| RSP_0271 | <i>crtI</i>  | ✓         |
| RSP_0272 | <i>crtA</i>  | ✓         |
| RSP_0279 | <i>bchG</i>  | ✓         |
| RSP_0281 | <i>bchE</i>  | ✓         |
| RSP_0283 | <i>ppaA</i>  | ✓         |
| RSP_0284 | <i>bchF</i>  | ✓         |
| RSP_0314 | <i>pucB</i>  | ✓         |
| RSP_1518 | <i>prrA</i>  | ✓         |
| RSP_1556 | <i>puc2B</i> | ✓         |
| RSP_4172 | Hypothetical | ✗         |

\*Verified by ChIP-seq and gene expression analysis
