# Supplementary material for: An Integrated Approach to Reconstructing Genome-Scale Transcriptional Regulatory Networks
Source: PubMed Central journal article supplement (PMC4344238; doi:10.1371/journal.pcbi.1004103), 2015-02-27

Precision

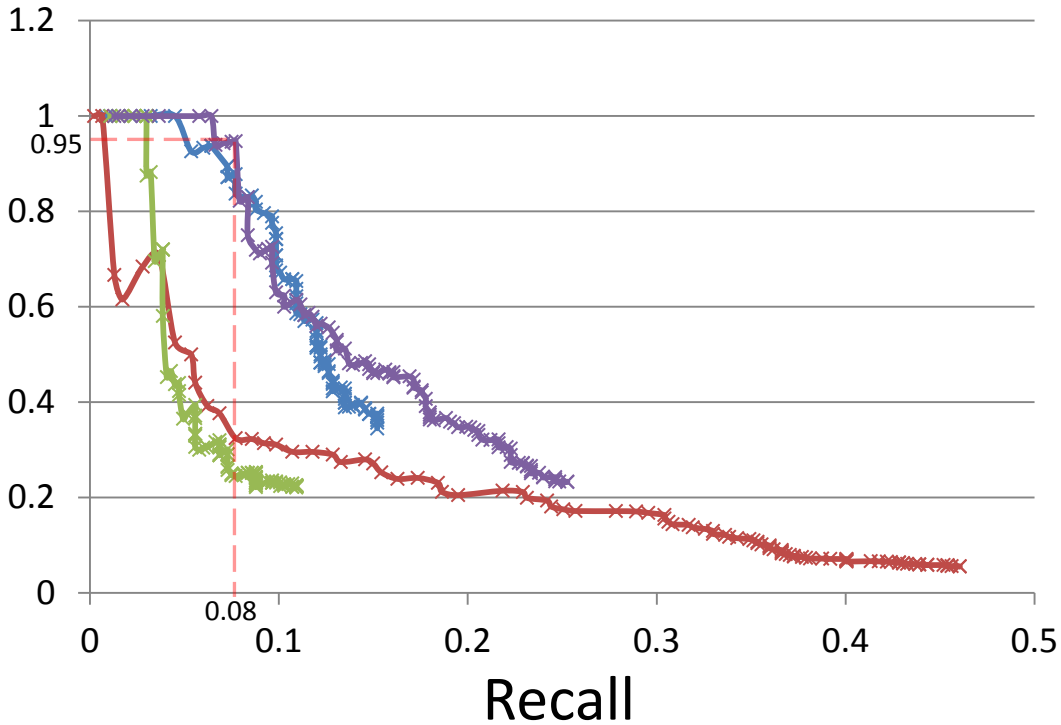

Supplement: pcbi.1004103.s008.pdf [file pcbi.1004103.s008.pdf]
