# Supplementary material for: An Integrated Approach to Reconstructing Genome-Scale Transcriptional Regulatory Networks
Source: PLoS Comput Biol. 2015 Feb 27;11(2):e1004103. doi: 10.1371/journal.pcbi.1004103 (PMC4344238; doi:10.1371/journal.pcbi.1004103)
Supplement: S5 Table — (XLSX) [file pcbi.1004103.s014.xlsx]

## Sheet: Sheet1
Table S5: Other genomic locations enriched for RSP_0489 in R. sphaeroides
ID	Annotation	chrID	peakStart	peakStop	peakSize	FC
RSP_0174 | RSP_0175	short-chain dehydrogenase | Lactate dehydrogenase-related dehydrogenase	chr1	1890800	1891399	600	8.94119
RSP_0996	pH adaption potassium efflux system PhaF subunit	chr1	2755000	2755599	600	6.42809
RSP_1110	hypothetical protein	chr1	2867600	2867999	400	6.09049
RSP_1143	4Fe-4S ferredoxin iron-sulfur cluster binding protein	chr1	2904800	2905399	600	4.91356
RSP_1220	heat-inducible transcription repressor	chr1	2993800	2994199	400	4.20169
RSP_1737	30S ribosomal protein S13	chr1	319200	319799	600	6.2994
RSP_2014 | RSP_2015	Protein of unknown function (DUF3108) | hypothetical protein	chr1	616800	617399	600	12.9147
RSP_2777	3-oxoacyl-(acyl-carrier-protein) synthase	chr1	1424400	1424799	400	8.33366
RSP_3337	ABC spermidine/putrescine transporter periplasmic binding protein	chr2	401800	402399	600	4.11532
RSP_3390	ABC Fe3+-siderophores transporter ATPase subunit	chr2	455800	456399	600	6.55476
RSP_6024	hypothetical protein	chr1	486800	487199	400	4.07165
		plasmidA	68000	68399	400	25.582
		chr1	1353200	1353799	600	13.8018
		chr1	21200	21799	600	8.27797
		chr1	268000	268599	600	7.21805
		chr1	134600	134999	400	7.07748
		chr1	222800	223199	400	6.866
		chr1	1861200	1861799	600	6.50776
