# Supplementary material for: An Integrated Approach to Reconstructing Genome-Scale Transcriptional Regulatory Networks
Source: PLoS Comput Biol. 2015 Feb 27;11(2):e1004103. doi: 10.1371/journal.pcbi.1004103 (PMC4344238; doi:10.1371/journal.pcbi.1004103)
Supplement: S8 Table — (XLSX) [file pcbi.1004103.s017.xlsx]

## Sheet: Sheet1
Table S8: Comparison of predictions from integrated R. sphaeroides TRN to expression-based approaches
TFs	Total no. of target genes (T)*	CLR (TP/FP)*	GENIE3 (TP/FP)	LeMoNe (TP/FP)	Integrated (TP/FP)
PpsR	39	0 (2)	0 (2)	0 (0)	36 (1)
FnrL	58	0 (6)	0 (0)	0 (0)	56 (35)
RpoHI	175	4 (0)	7 (0)	6 (1)	14 (7)
RpoHII	144	8 (10)	24 (6)	28 (0)	17 (0)
SigmaE	15	8 (5)	8 (0)	10 (0)	8 (0)
RSP_3341	9	1 (0)	7 (0)	7 (0)	7 (0)
RSP_0489	19	7 (3)	11 (12)	8 (12)	11 (8)
Overall	459	28 (26)	57 (20)	59 (13)	149 (51)
Precision (Recall)		52% (6%)	74% (12%)	82% (13%)	75% (32%)
* TP – True positive prediction; FP – false positive predictions; T – total number of know interactions for a given TF. Precision = TP/(TP+FP); Recall = TP/T. All predictions not verified via genomic protein-DNA interaction assays were considered as FPs for the purpose of this analysis.
